# Supplementary material for: Universal gut microbial relationships in the gut microbiome of wild baboons
Source: eLife journal article supplement (doi:10.7554/elife.83152), 2023-05-09
Supplement: supp [file elife-83152-supp-v1.zip]

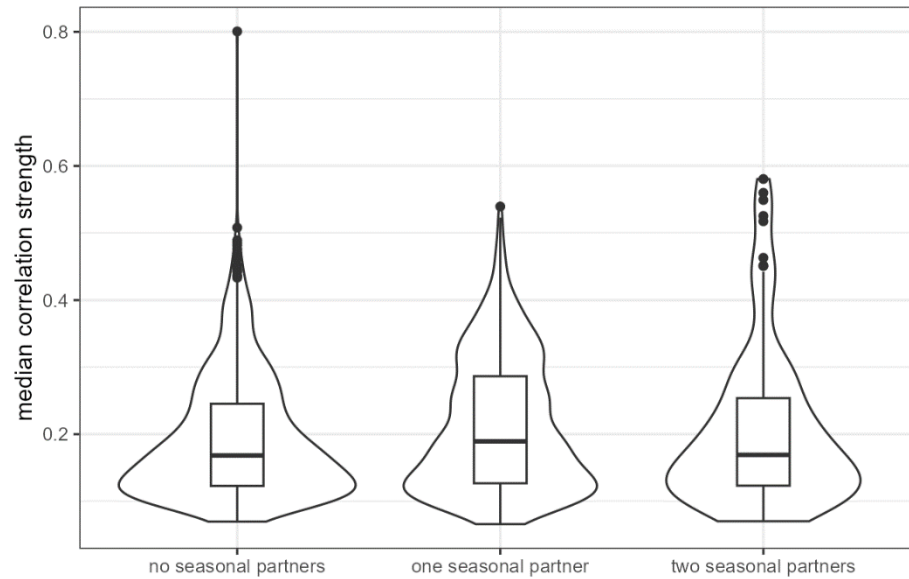

**Figure 4 - figure supplement 2. ASV-ASV pairs with two “seasonally varying” partners have slightly higher median correlations across hosts.** “Seasonally varying” ASVs were those identified as having seasonally differential CLR abundance in Björk et al. (2022). ASV-ASV pairs with at least one “seasonal” member had significantly higher median correlation across hosts than did pairs where neither partner was seasonal (difference of 0.018, Wilcoxon rank sum test  $p = 0.000326$ ).
