# Supplementary material for: Universal gut microbial relationships in the gut microbiome of wild baboons
Source: eLife journal article supplement (doi:10.7554/elife.83152), 2023-05-09
Supplement: supp [file elife-83152-supp-v1.zip]

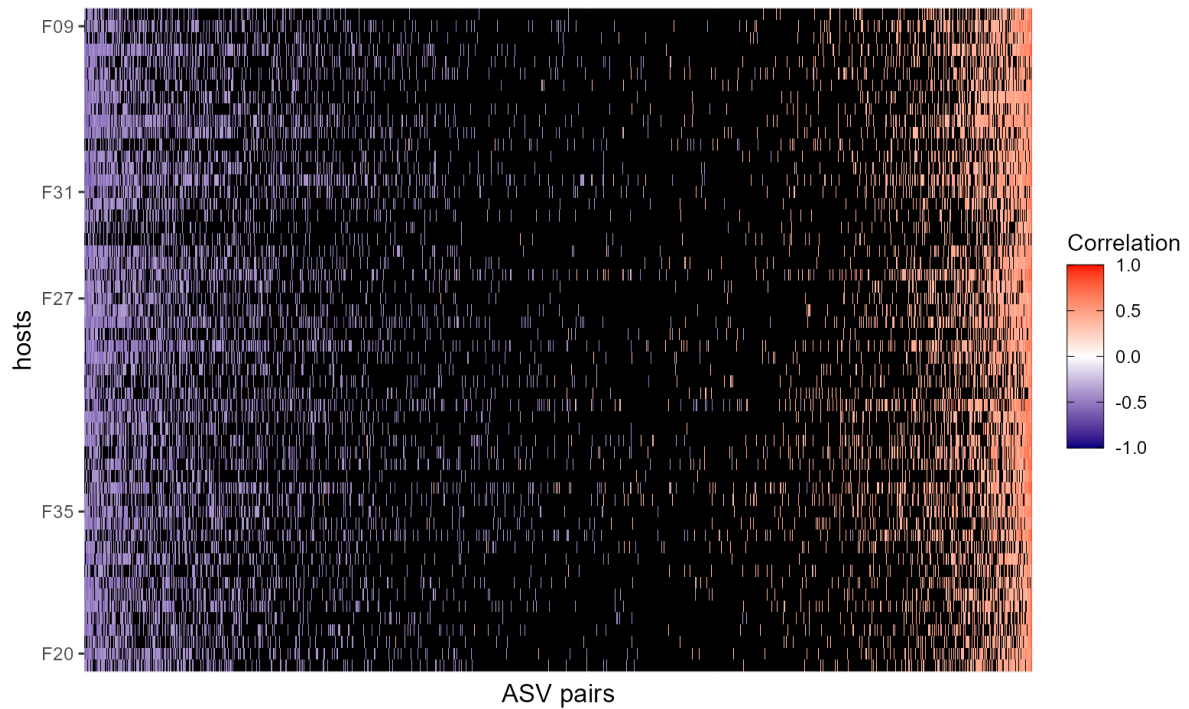

**Figure 2 - figure supplement 2. Heat map of correlation of ASV-level CLR taxon pairs where pairs not exceeding confidence cutoffs have been omitted.** This heat map is identical to the one shown in Figure 2A in the main text, but black cells represent host-level ASV pairs whose estimated CLR correlation did not exceed the confidence cutoffs described in **Figure 2 – figure supplement 3**, that is a CLR ASV-ASV correlation of less than -0.342 or greater than 0.328. The orientation of rows and columns is the same as in Figure 2A.
