# Supplementary material for: Universal gut microbial relationships in the gut microbiome of wild baboons
Source: eLife journal article supplement (doi:10.7554/elife.83152), 2023-05-09
Supplement: supp [file elife-83152-supp-v1.zip]

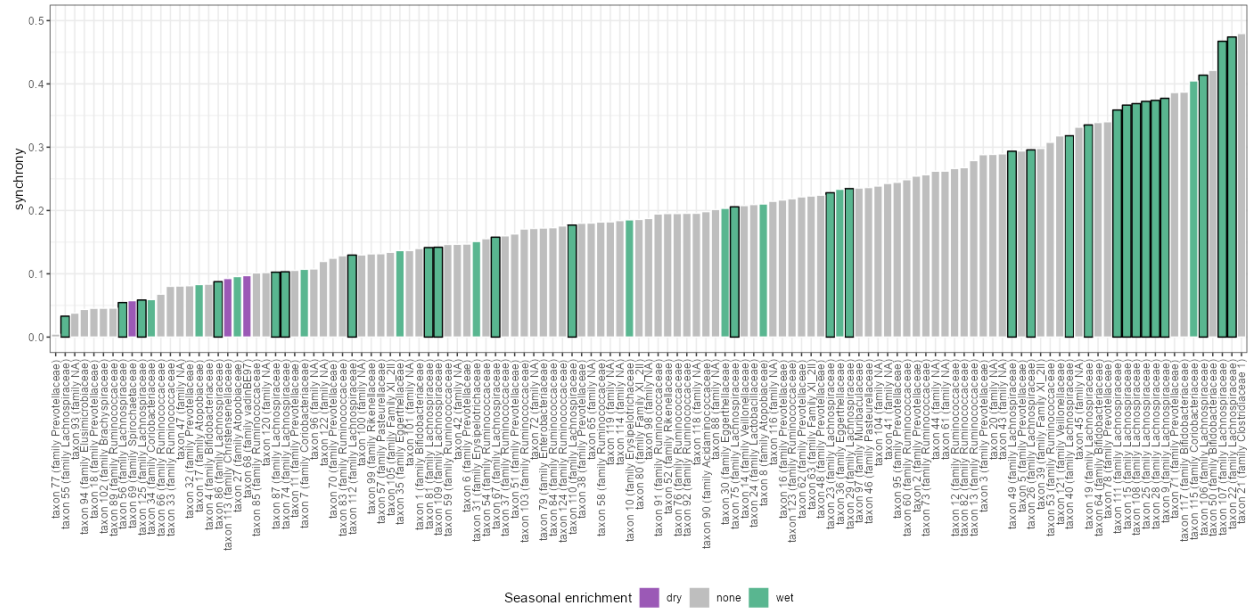

**Figure 4 - figure supplement 4. Seasonality is not associated with synchrony.** Synchrony estimates for all ASVs are given as bar plots. ASVs that were identified as having seasonally differential CLR abundance in Björk et al. (2022) are labeled by the season in which they were more abundant: dry or wet. Seasonally variable labels do not predict synchrony (ANOVA,  $p=0.358$ ).
