# Supplementary material for: Universal gut microbial relationships in the gut microbiome of wild baboons
Source: eLife journal article supplement (doi:10.7554/elife.83152), 2023-05-09
Supplement: supp [file elife-83152-supp-v1.zip]

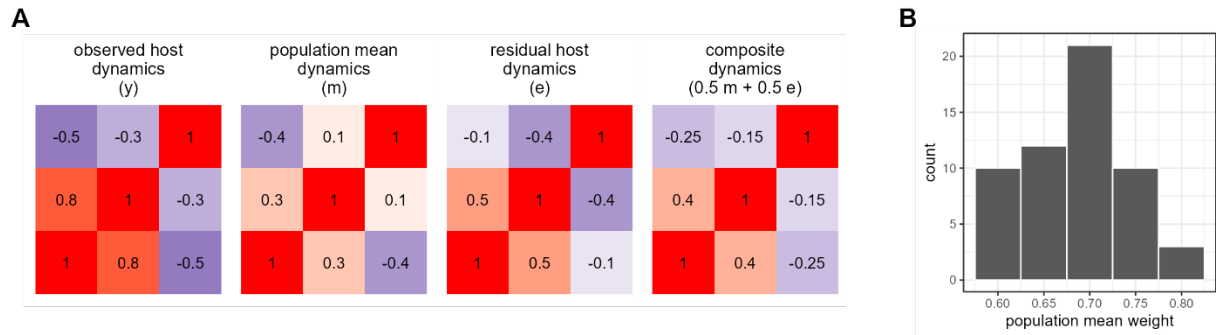

**Figure 3 - figure supplement 2. Quantifying the relative strength of universal versus individualized dynamics.** Panel (A) shows observed (y), population mean (m), and host residual dynamics ( $e = y - m$ ) for a single hypothetical host with three ASVs. The fourth matrix shows a simulated case where host-level and population-level mean dynamics are added in equal proportions ( $0.5 m + 0.5 e$ ) to approximate y. We estimate the proportion host- versus individual-level signal as the combination of mean and residual which best approximates y. Panel (B) shows the results of this procedure applied to the Amboseli data, giving a per-host estimate of population-level contribution to the observed CLR ASV-ASV correlations.
