# Supplementary material for: Universal gut microbial relationships in the gut microbiome of wild baboons
Source: eLife journal article supplement (doi:10.7554/elife.83152), 2023-05-09
Supplement: supp [file elife-83152-supp-v1.zip]

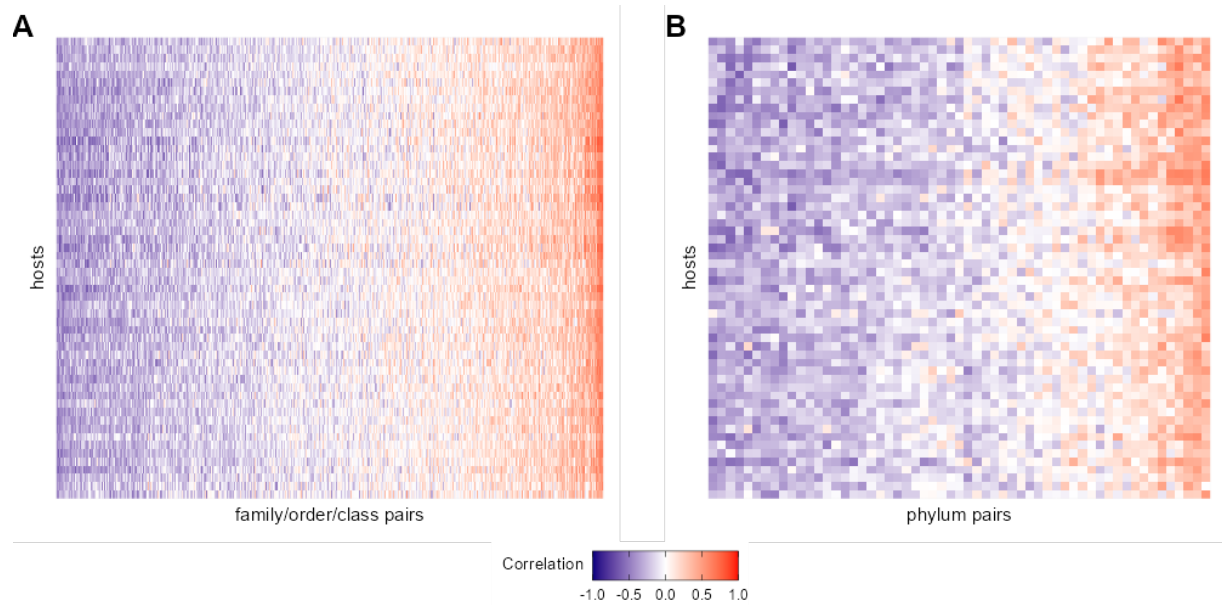

**Figure 2 - figure supplement 1. Heat maps of correlation of CLR taxon pairs at taxonomic levels higher than ASV.** Each heat map shows the Pearson's correlation coefficient of CLR abundances between pairs of taxa that met our filtering criteria (x-axis) in each of the 56 baboons (y-axis). Panel (A) gives 473 pairs of taxa agglomerated to the most granular possible family, order, or class. Panel (B) gives 57 phylum-phylum pairs. See **Fig. 2A** for a heatmap of ASV-ASV correlation patterns across hosts.
