# Supplementary material for: Universal gut microbial relationships in the gut microbiome of wild baboons
Source: eLife journal article supplement (doi:10.7554/elife.83152), 2023-05-09
Supplement: supp [file elife-83152-supp-v1.zip]

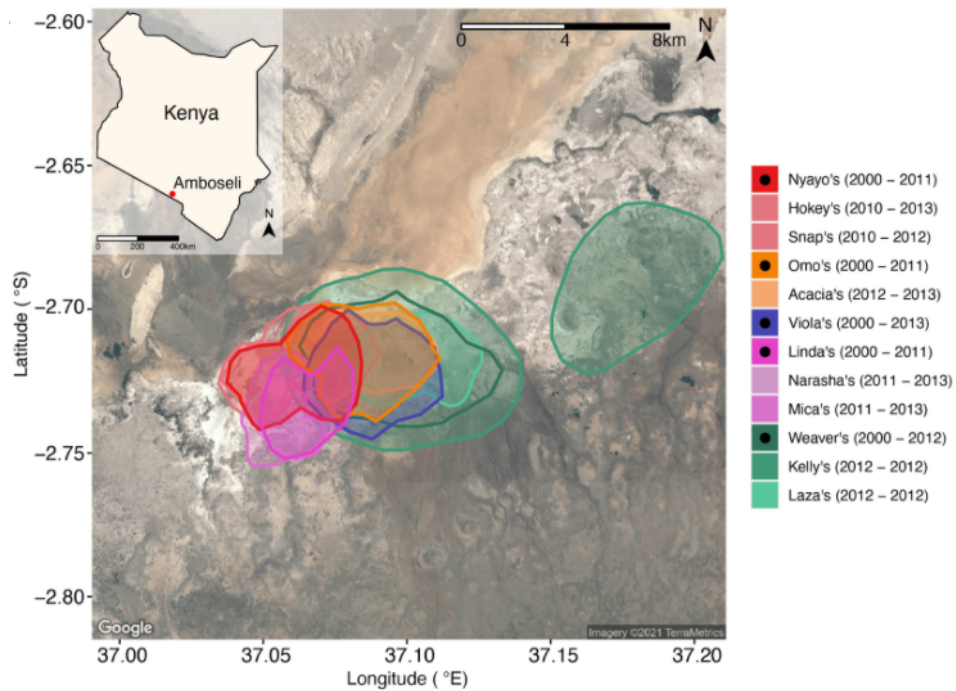

**Figure 1 – figure supplement 1. Host ranging patterns.** Ranging patterns for the baboon social groups included in this study during the period of microbiome sampling (May 19, 2000 to September 19, 2013). See [4] for an in-depth analysis of environmental drivers of microbiome dynamics in this host population.
