# Supplementary material for: Universal gut microbial relationships in the gut microbiome of wild baboons
Source: eLife journal article supplement (doi:10.7554/elife.83152), 2023-05-09
Supplement: supp [file elife-83152-supp-v1.zip]

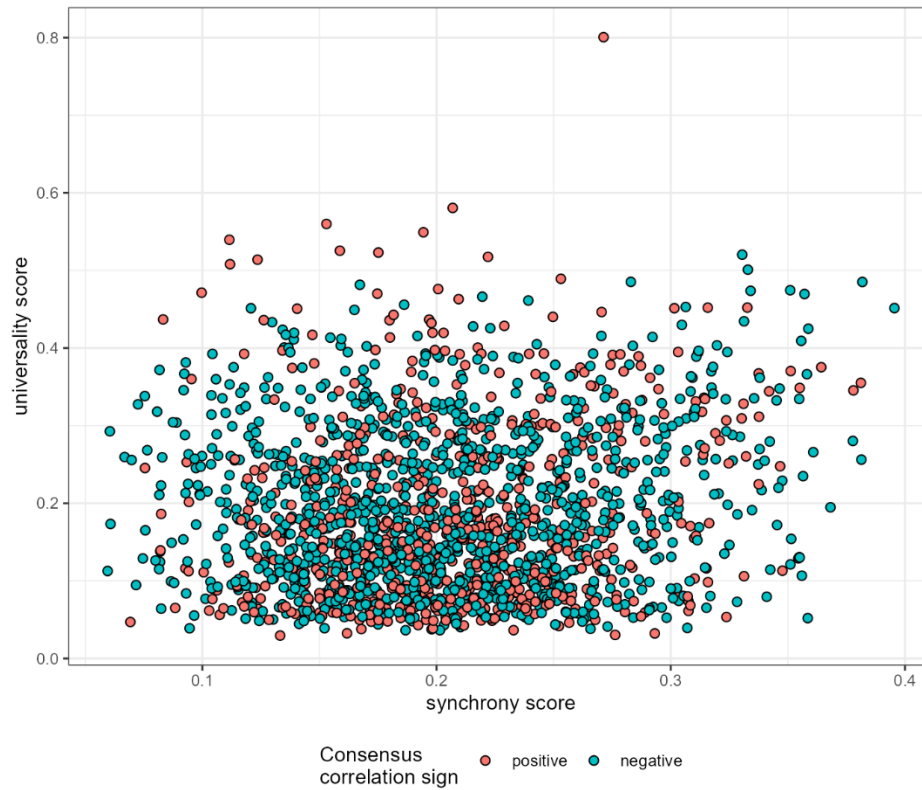

**Figure 4 - figure supplement 5. Synchrony weakly predicts universality.** Mean ASV-ASV pair synchrony estimates are plotted against universality scores for all 1,878 high confidence ASV pairs. Synchrony weakly predicts universality ( $r=0.116$ ,  $p < 0.0001$ ).
