# Supplementary material for: Universal gut microbial relationships in the gut microbiome of wild baboons
Source: eLife journal article supplement (doi:10.7554/elife.83152), 2023-05-09
Supplement: supp [file elife-83152-supp-v1.zip]

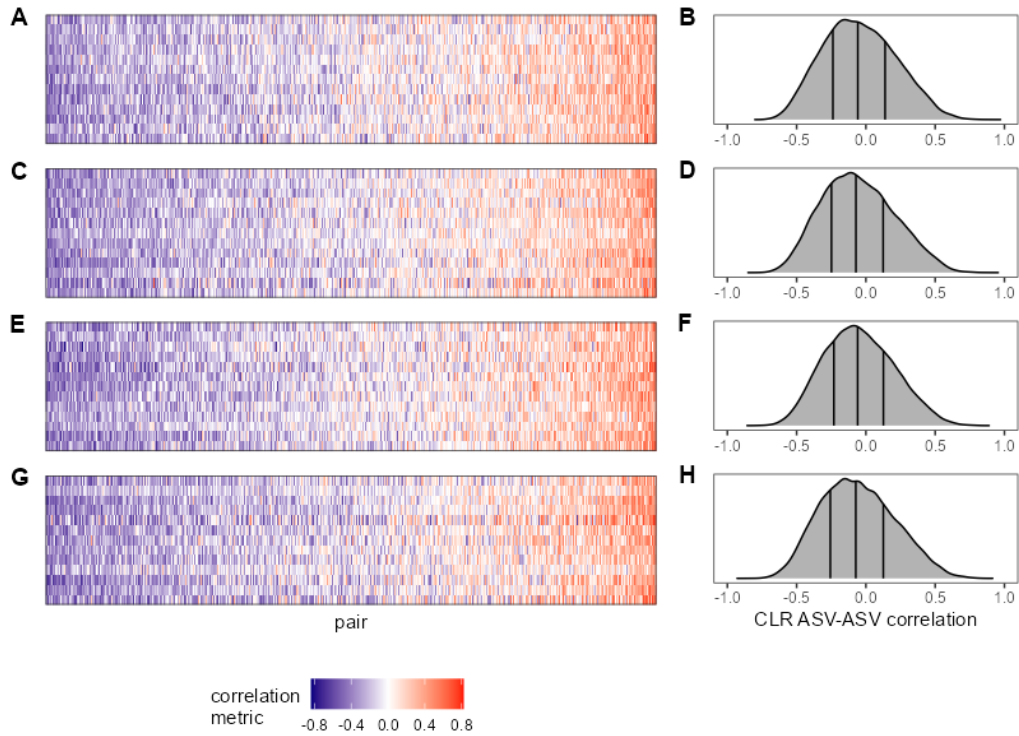

**Figure 5 – figure supplement 1. Within- and between-age bin ASV-ASV correlations are similar.**

For a subset of hosts with sufficient sampling across age "bins" (at least 35 samples within two of the following age ranges: juvenile = 0-6 years; prime age adult = 6-13 years; older adult = 13+ years), ASV-ASV correlation is visualized as a heatmap. Panel (A) shows "juvenile" ASV-ASV correlations for hosts F32, F06, F27, F36, F10, F01, F07, F35, M09, F05, M10, F22, F26 (top row to bottom) and (B) the distribution of those correlations. Panels (C) and (D) give "prime age" correlations for the same hosts. Panel (E) shows prime age ASV-ASV correlations for the hosts F28, F17, F16, F31, M03, M08, F04, F12, F03, F33, M02, F14, F08 (top row to bottom) and (F) the distribution of those correlations. Panels (G) and (F) give "older adult" correlations for the same hosts.
