# Supplementary material for: Universal gut microbial relationships in the gut microbiome of wild baboons
Source: eLife journal article supplement (doi:10.7554/elife.83152), 2023-05-09
Supplement: supp [file elife-83152-supp-v1.zip]

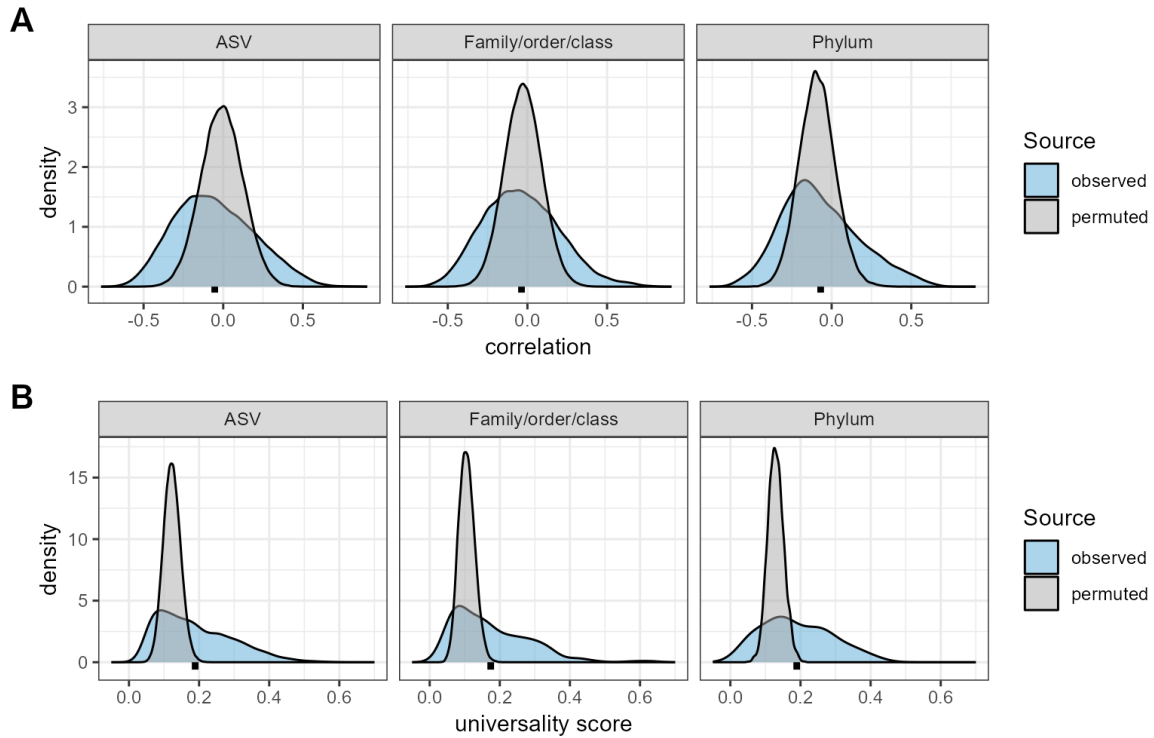

**Figure 2 – figure supplement 3. Confidence cutoffs for correlations and universality scores.**

The three plots in panel (A) show density distributions of the observed correlations between taxa (blue distributions) compared to random expectation (gray distributions) for three taxonomic partitions of the data: ASVs, family/order/class-level assignments, and phyla. The random distributions were generated by permuting the data 10 times per-host, shuffling taxonomic identities within individual microbiome samples and re-calculating taxon-taxon correlations in these permuted data sets. Mean correlations for the observed distributions are shown as black points below each distribution. The observed correlations for ASVs range from -0.767 to 0.904 (mean = -0.009; median = -0.010); for family/order/class designations range from -0.719 to 0.803 (mean = -0.028; median = -0.029); and for phyla from -0.645 to 0.687 (mean = -0.088; median = -0.092). Panel (B) shows density distributions of the observed universality scores in blue compared to random expectations in grey, for pairs of taxa at the ASVs, family/order/class-level, and phyla. Small, dashed black lines underneath each density indicate the mean observed universality score at that taxonomic level.
