# Supplementary material for: Universal gut microbial relationships in the gut microbiome of wild baboons
Source: eLife journal article supplement (doi:10.7554/elife.83152), 2023-05-09
Supplement: supp [file elife-83152-supp-v1.zip]

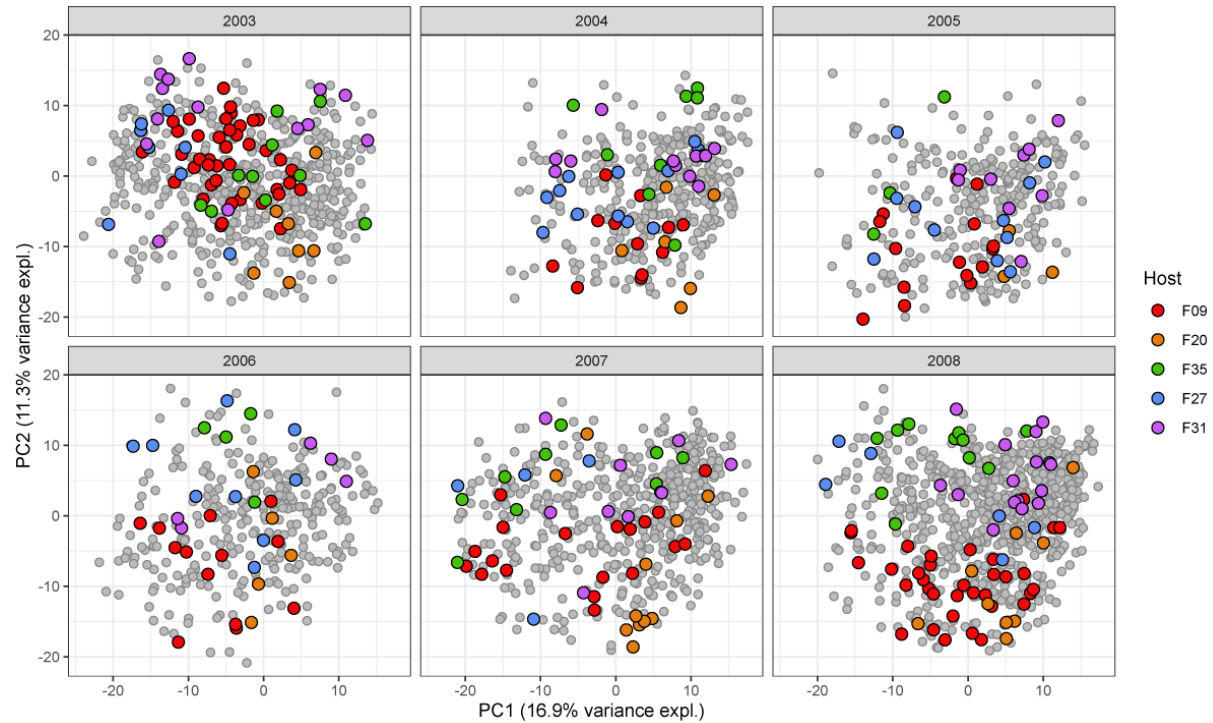

**Figure 1 - figure supplement 2. Variation across hosts.** Each baboon exhibits a somewhat distinctive gut microbial community ( $p < 0.0001$ ; ANOVA) summarized here by the first two principal components of CLR-transformed ASV abundances of ASVs during six representative years of sample collection (see Fig. 1B). Colored dots represent one of five especially well sampled hosts, and colors indicate samples from the same host. Grey dots represent all other samples collected in the same year.
