# Supplementary material for: Universal gut microbial relationships in the gut microbiome of wild baboons
Source: eLife journal article supplement (doi:10.7554/elife.83152), 2023-05-09
Supplement: supp [file elife-83152-supp-v1.zip]

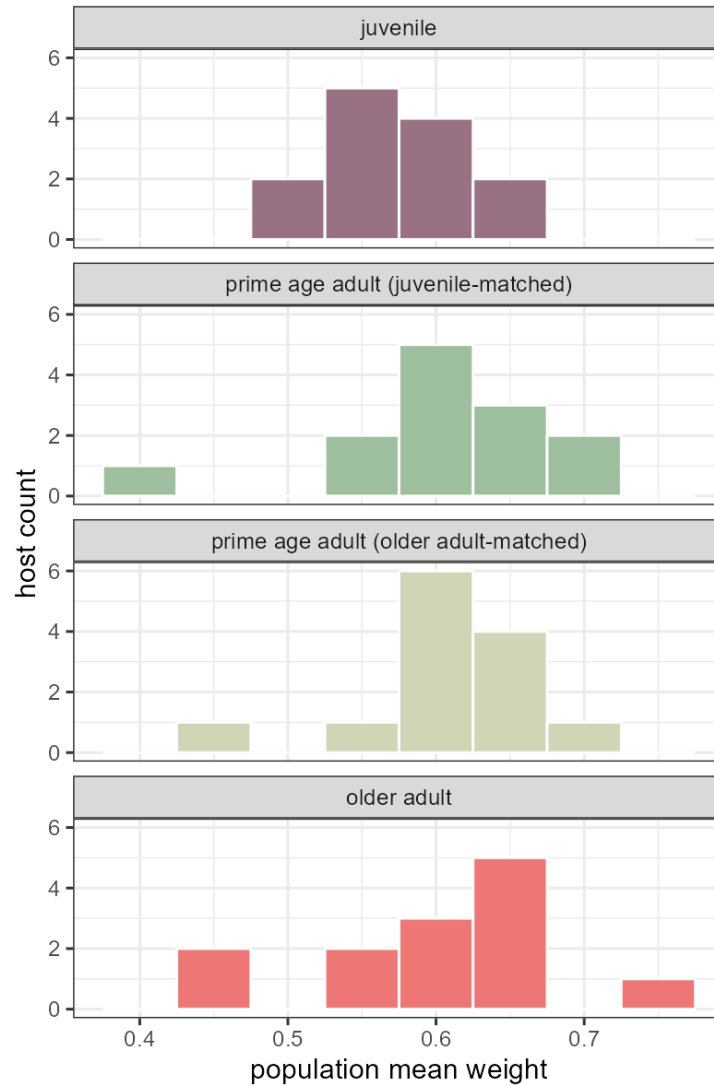

**Figure 5 - figure supplement 2. Quantifying the relative strength of universal versus individualized dynamics across age ranges.** Histograms show estimates of the population-level contribution to observed CLR ASV-ASV correlations in each 13-host age bin. (Hosts are matched between age bins where noted.) Variation in the population-level contribution to observed CLR ASV-ASV correlations is slightly, but not significantly, larger in the prime age and older adult bins than in the juvenile bin. Compare these estimates to those obtained for overall hosts series in Fig. 3 – figure supplement 2.
