# Supplementary material for: Universal gut microbial relationships in the gut microbiome of wild baboons
Source: eLife journal article supplement (doi:10.7554/elife.83152), 2023-05-09
Supplement: supp [file elife-83152-supp-v1.zip]

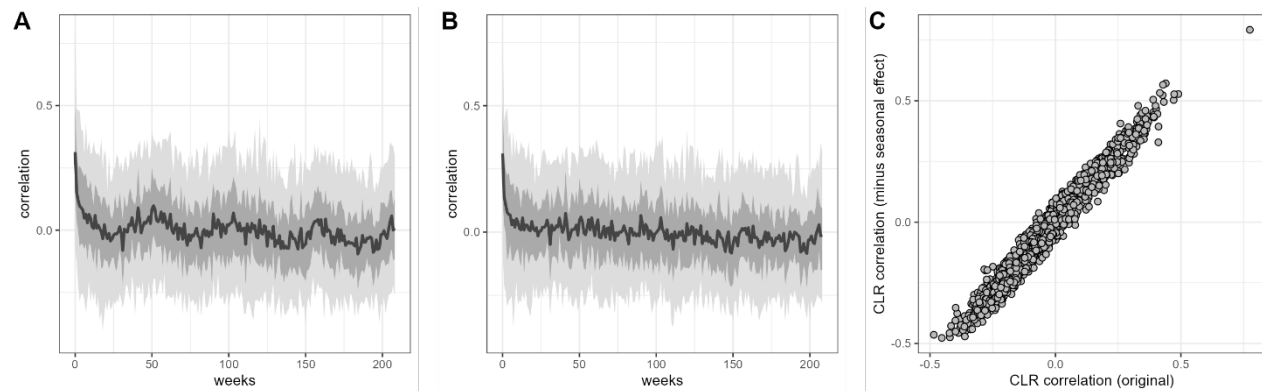

**Figure 4 - figure supplement 1. Estimates are CLR ASV-ASV correlation are similar after removing seasonal trend.** Panel (A) shows sample-sample autocorrelation estimates for the CLR-transformed data from 56 baboon hosts. Panel (B) shows sample-sample autocorrelation for the same data after the removal of a seasonal trend by `arima()` in R. Estimates of CLR ASV-ASV correlation derived from the original (basset) model and this per-ASV linear autoregressive model are highly similar, as shown in panel (C) where  $r=0.982$ .
